# Supplementary material for: Probing the chirality and optical activity of organic molecules through the anisotropic photoluminescence of porous silicon
Source: Royal Society of Chemistry journal article supplement (doi:10.1039/d3tc01058a), 2023-01-01
Supplement: d3tc01058a1.pdf [file d3tc01058a1.pdf]

# Supporting Information

## Probing the Chirality and Optical Activity of Organic Molecules Through the Anisotropic Photoluminescence of Porous Silicon

Chih-Hsuan Hu<sup>a</sup>, Vincent K. S. Hsiao<sup>\*a</sup>, Chih-Chien Chu<sup>\*b</sup>

<sup>a</sup>Department of Applied Materials and Optoelectronic Engineering, National Chi Nan University, Nantou 54561, Taiwan

<sup>b</sup>Department of Medical Education and Department of Medical Applied Chemistry, Chung Shan Medical University, Taichung 40201, Taiwan

Fig. S1 FA spectra and relative degree of polarization measured using **method I** for PSi containing chiral molecules ( $1 \times 10^{-3}$  M in ethanol solution).

Fig. S2 FA spectra and relative degree of polarization measured using **method I** for PSi containing chiral molecules ( $1 \times 10^{-3}$  M in ethanol solution).

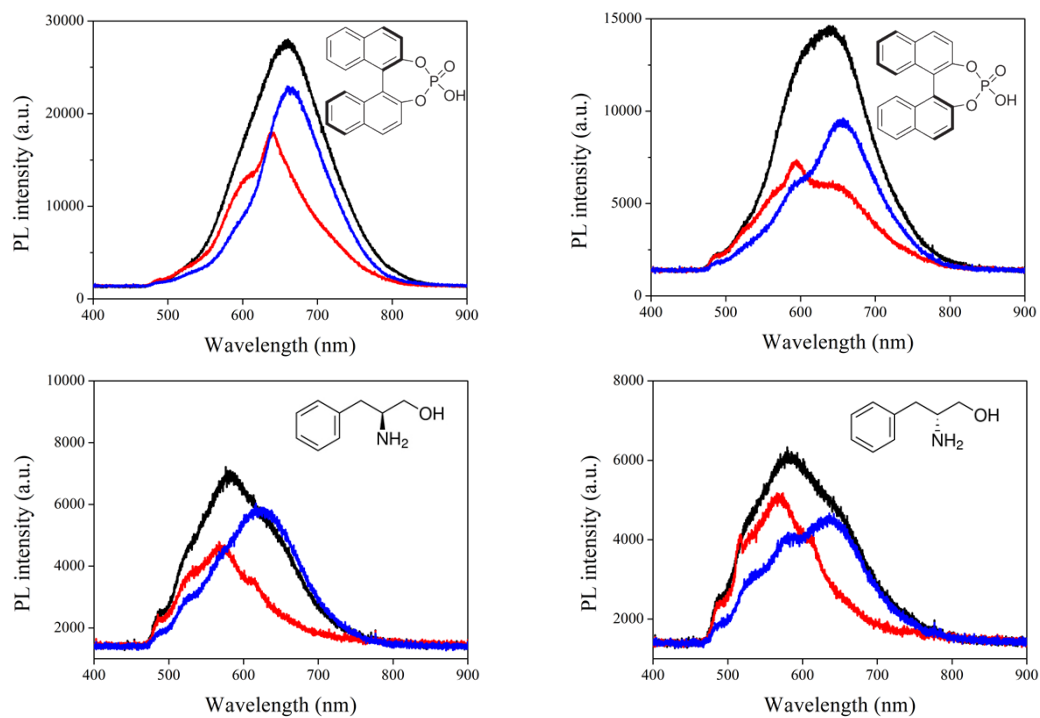

Fig. S3 FA spectra and relative degree of polarization measured using **method II** for PSi containing chiral molecules ( $1 \times 10^{-3}$  M in ethanol solution). The black spectrum is the PL from PSi sample containing different chiral molecules before separating from broadband polarization beam splitter, and the blue ( $I_{\parallel}$ ) and red ( $I_{\perp}$ ) spectrum are anisotropic PL from the same samples.

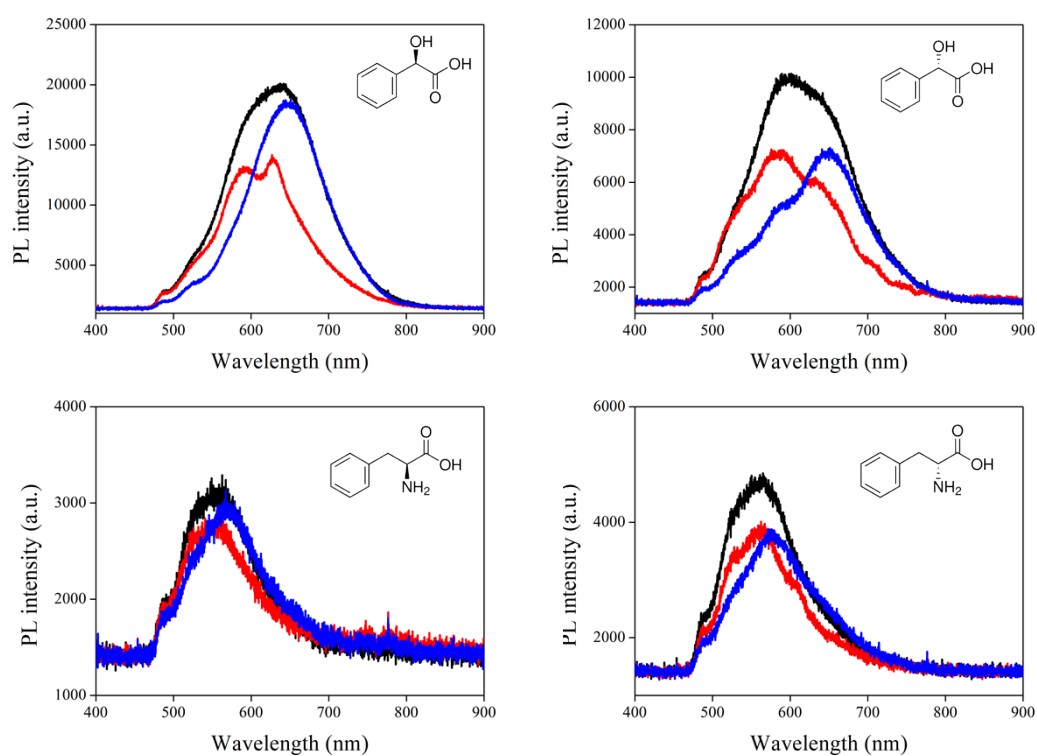

Fig. S4 FA spectra and relative degree of polarization measured using **method II** for PSi containing chiral molecules ( $1 \times 10^{-3}$  M in ethanol solution). The black spectrum is the PL from PSi sample containing different chiral molecules before separating from broadband polarization beam splitter, and the blue ( $I_{\parallel}$ ) and red ( $I_{\perp}$ ) spectrum are anisotropic PL from the same samples.
